# Supplementary material for: Rodlet Cells Provide First Line of Defense against Swimbladder Nematode and Intestinal Coccidian in Anguilla anguilla
Source: MDPI journal article supplement (doi:10.3390/fishes8020066), 2023-01-21
Supplement: s1 [file s1]

Archive with 1 entries (1 files):
- fishes-2147286-supplementary.pdf
