# Supplementary material for: Rodlet Cells Provide First Line of Defense against Swimbladder Nematode and Intestinal Coccidian in Anguilla anguilla
Source: MDPI journal article supplement (doi:10.3390/fishes8020066), 2023-01-21
Supplement: s1 [file s1 › fishes-2147286-supplementary.pdf]

## Supplementary material

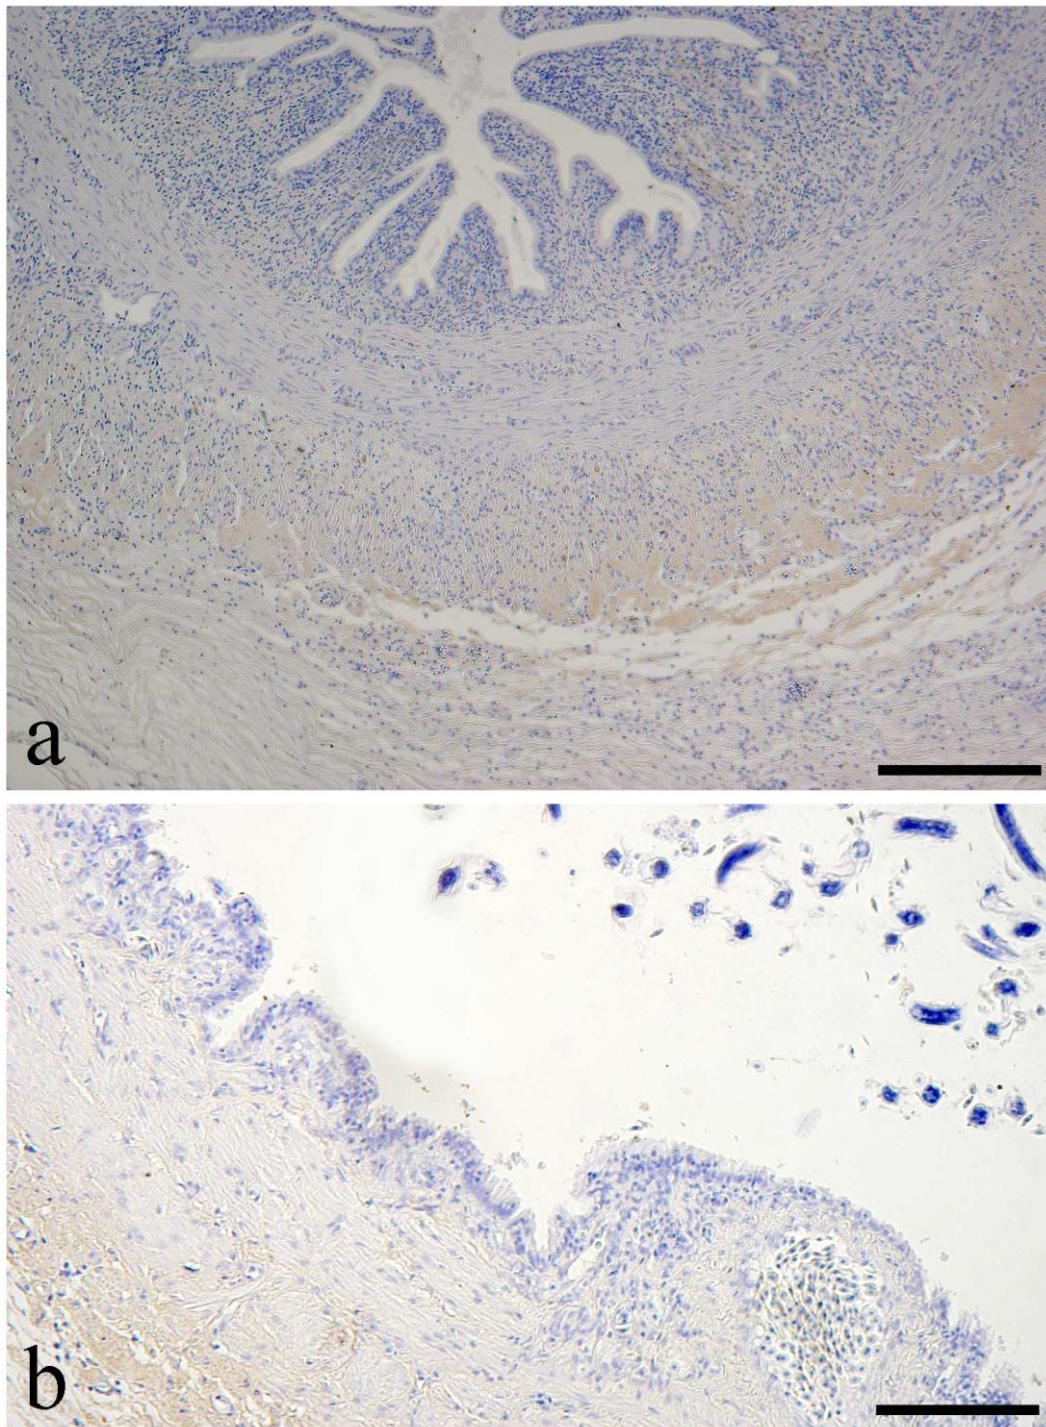

Figure S1. Negative control sections of a parasitized swimbladder of *Anguilla anguilla*. (a) The swimbladder wall is thick, and the *tunica mucosa* shows high and enlarged epithelial folds. The section was treated with PBS instead of the monoclonal mouse primary antibody, followed by incubation with the anti-mouse biotinylated immunoglobulins; scale bar: 200  $\mu\text{m}$ . (b) High magnification of the *tunica mucosa* in an infected swimbladder with several *Anguilliculoides crassum* larvae in the lumen. The section was treated with PBS instead of the polyclonal rabbit primary antibody, followed by incubation with the anti-rabbit biotinylated immunoglobulins; scale bar: 100  $\mu\text{m}$ .

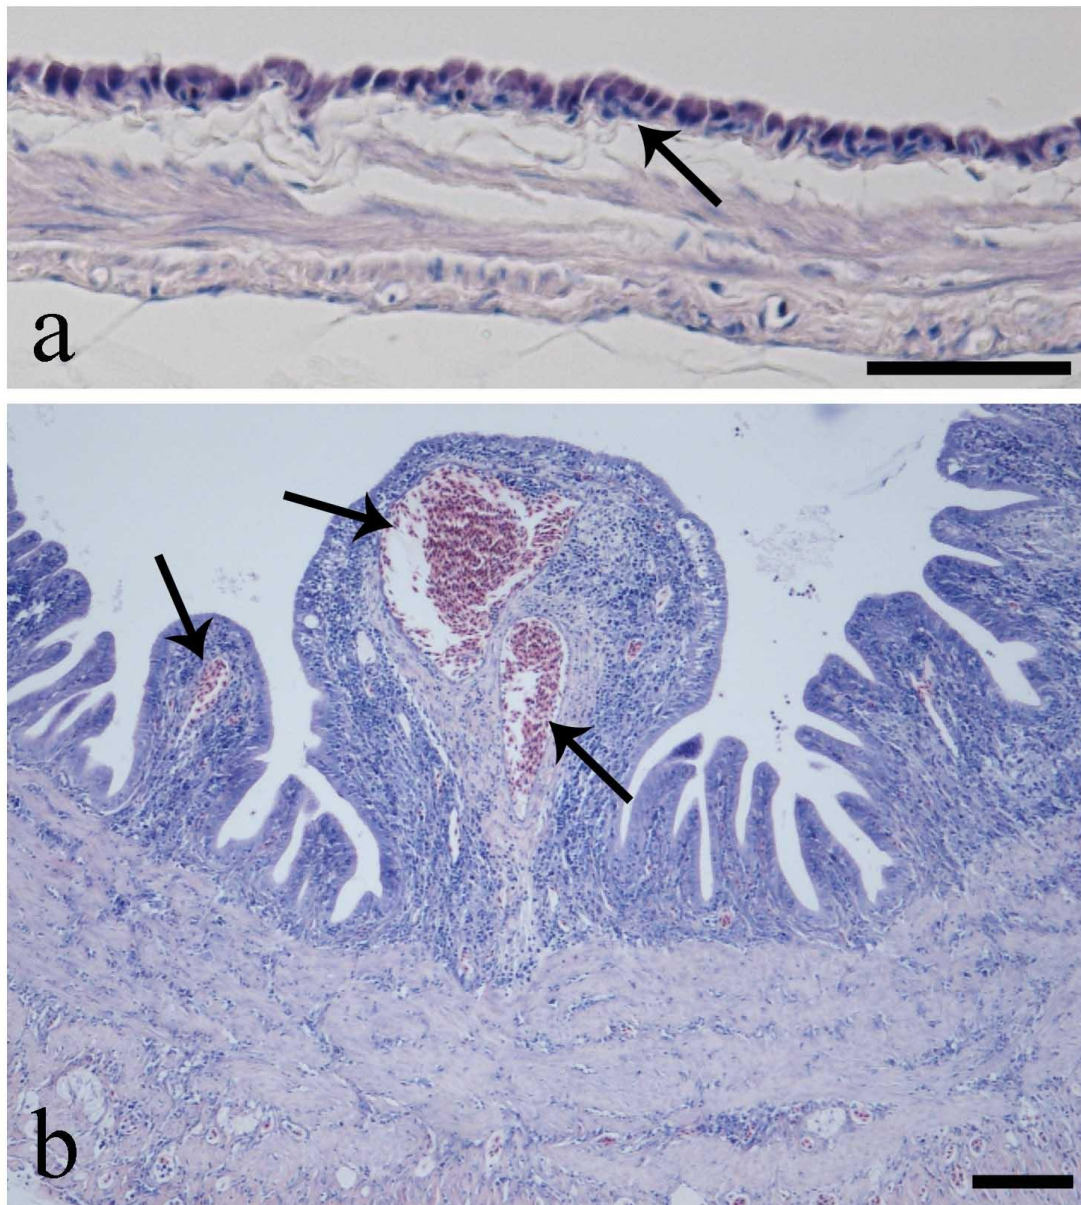

Figure S2. Histological sections of uninfected and infected swimbladders of *Anguilla anguilla*. **(a)** Uninfected SB, note short height of the epithelium (arrow), Alcian Blue/Haematoxylin and Eosin stain, scale bar = 50  $\mu$ m; **(b)** Heavily infected SB, within the epithelium papillose aspect, dilation of its blood vessels and hemorrhages are clearly visible (arrows), Alcian Blue/Haematoxylin and Eosin stain, scale bar = 100  $\mu$ m.

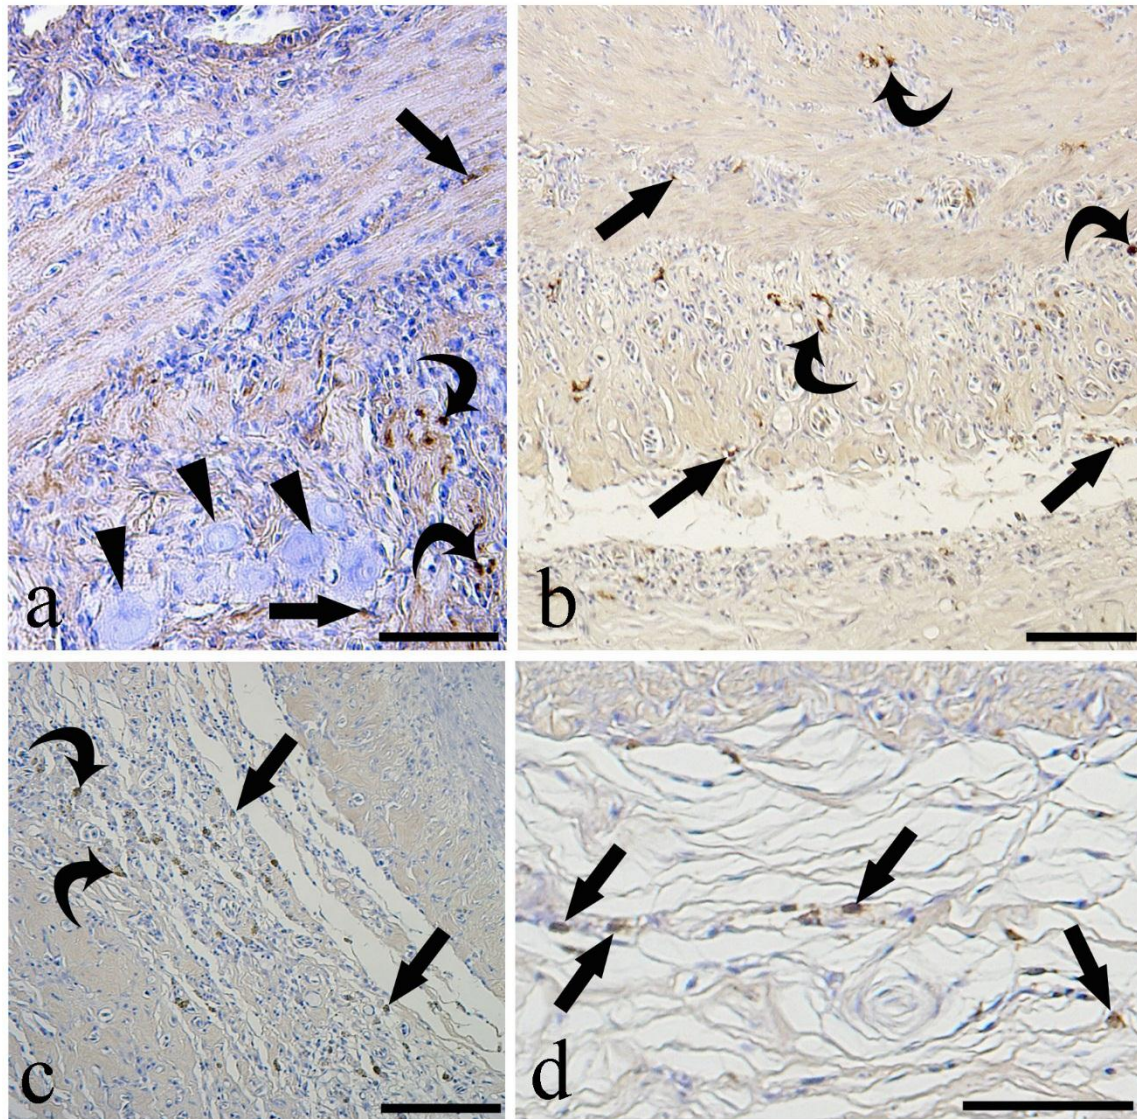

Figure S3. Immunohistochemical reactions on uninfected sections of the *Anguilla anguilla* swimbladder. (a) A low number of mast cells (arrows) and presumable macrophages (curved arrows) immunoreactive to anti-histamine are observed in the *tunica submucosa*. Arrowheads show the neurons in a nervous ganglion; scale bar: 50  $\mu\text{m}$ . (b) The antibody anti-serotonin detected few mast cells (arrows) and presumable macrophages (curved arrows) in the *tunica submucosa*; scale bar: 100  $\mu\text{m}$ . (c) In the *tunica submucosa*, few mast cells (arrows) and presumable macrophages (curved arrows) immunoreactive to anti-inducible-NOS are detected; scale bar: 100  $\mu\text{m}$ . (d) Anti-Tryptase  $\epsilon$  identifies a low number of mast cells (arrows) in the *tunica submucosa*; scale bar: 50  $\mu\text{m}$ .

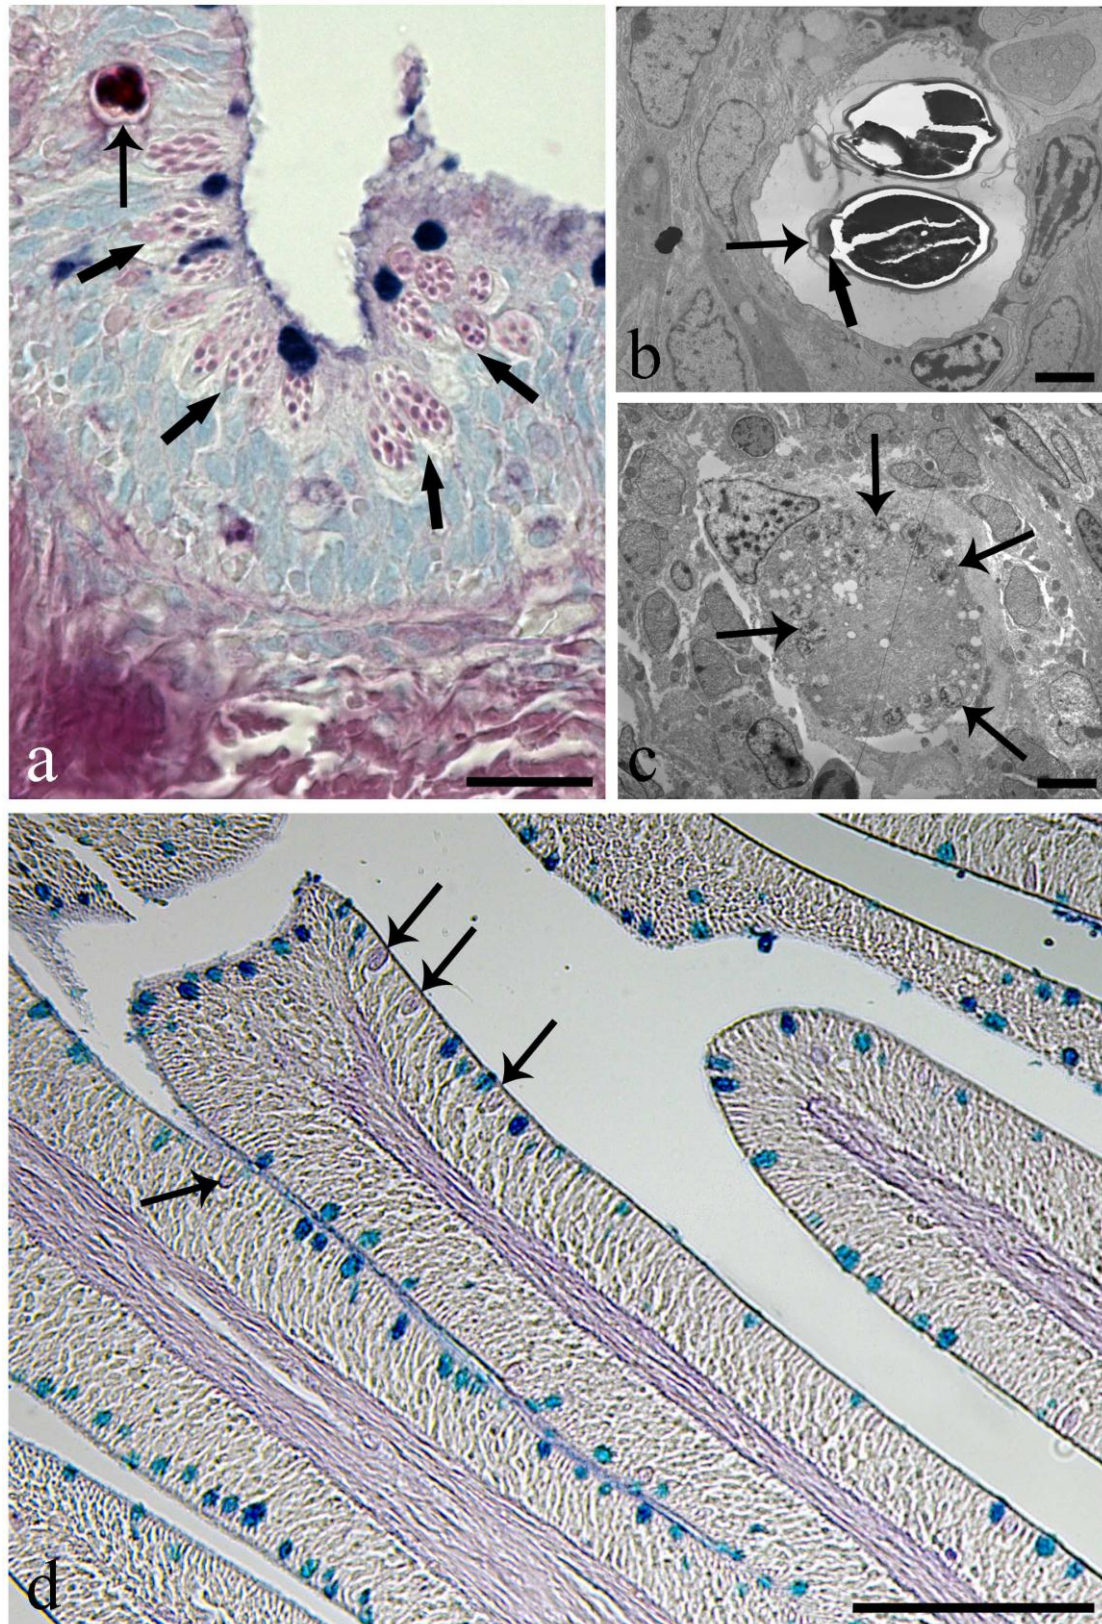

Figure S4. Light and electron microscopic figures of intestine of *Anguilla anguilla* infected with coccidian. **(a)** Note the presence of oocyst with sporocysts inside (arrow) near a cluster of the rodlet cells (thick arrows), Alcian Blue/Haematoxylin and Eosin stain, scale bar = 20  $\mu$ m; **(b)** In sporocyst Stieda body (arrow) and sub-Stieda (thick arrow) are evident, bar = 2.5  $\mu$ m; **(c)** Meront of coccidian, in its periphery nuclei in differentiation (arrows) are notable, bar = 2.8  $\mu$ m; **(d)** In the uninfected intestine of *A. anguilla*, low number of the rodlet cells are visible (arrows), Alcian Blue/Periodic Acid Schiff stain, scale bar = 100  $\mu$ m.
